# Supplementary material
Source: MDPI journal article supplement (https://www.mdpi.com/2673-8112/2/12/121)
Supplement: s1 [file s1]

# Supplementary Material

## Endemicity is not a victory: the unmitigated downside risks of widespread SARS-CoV-2 transmission

Madison Stoddard<sup>1</sup>, Alexander Novokhodko<sup>2</sup>, Sharanya Sarkar<sup>3</sup>, Debra Van Egeren<sup>4</sup>, Laura F. White<sup>5</sup>, Natasha S. Hochberg<sup>6</sup>, Michael S. Rogers<sup>7,8</sup>, Bruce Zetter<sup>7,8</sup>, Diane Joseph-McCarthy<sup>9</sup>, Arijit Chakravarty<sup>1\*</sup>

<sup>1</sup> Fractal Therapeutics, Lexington, MA 02420, USA; madison.stoddard@fractaltx.com

<sup>2</sup> University of Washington, Mechanical Engineering, Seattle, WA 98195, USA;

<sup>3</sup> Dartmouth College, Department of Microbiology and Immunology, Hanover, NH 03755, USA;

<sup>4</sup> Stanford Cancer Institute, Stanford University School of Medicine, Stanford, CA 94304 USA;

<sup>5</sup> Boston University School of Public Health, Boston, MA 02118, USA; lfwhite@bu.edu

<sup>6</sup> Novartis Institute for Biomedical Research, Cambridge, MA 02139, USA

<sup>7</sup> Harvard Medical School, Boston, MA 02115, USA;

<sup>8</sup> Boston Children's Hospital, Boston, MA 02115, USA

<sup>9</sup> Boston University, Department of Biomedical Engineering, Boston, MA 02215, USA;

\* Correspondence: arijit@fractaltx.com; Tel.: +1-857-526-1463

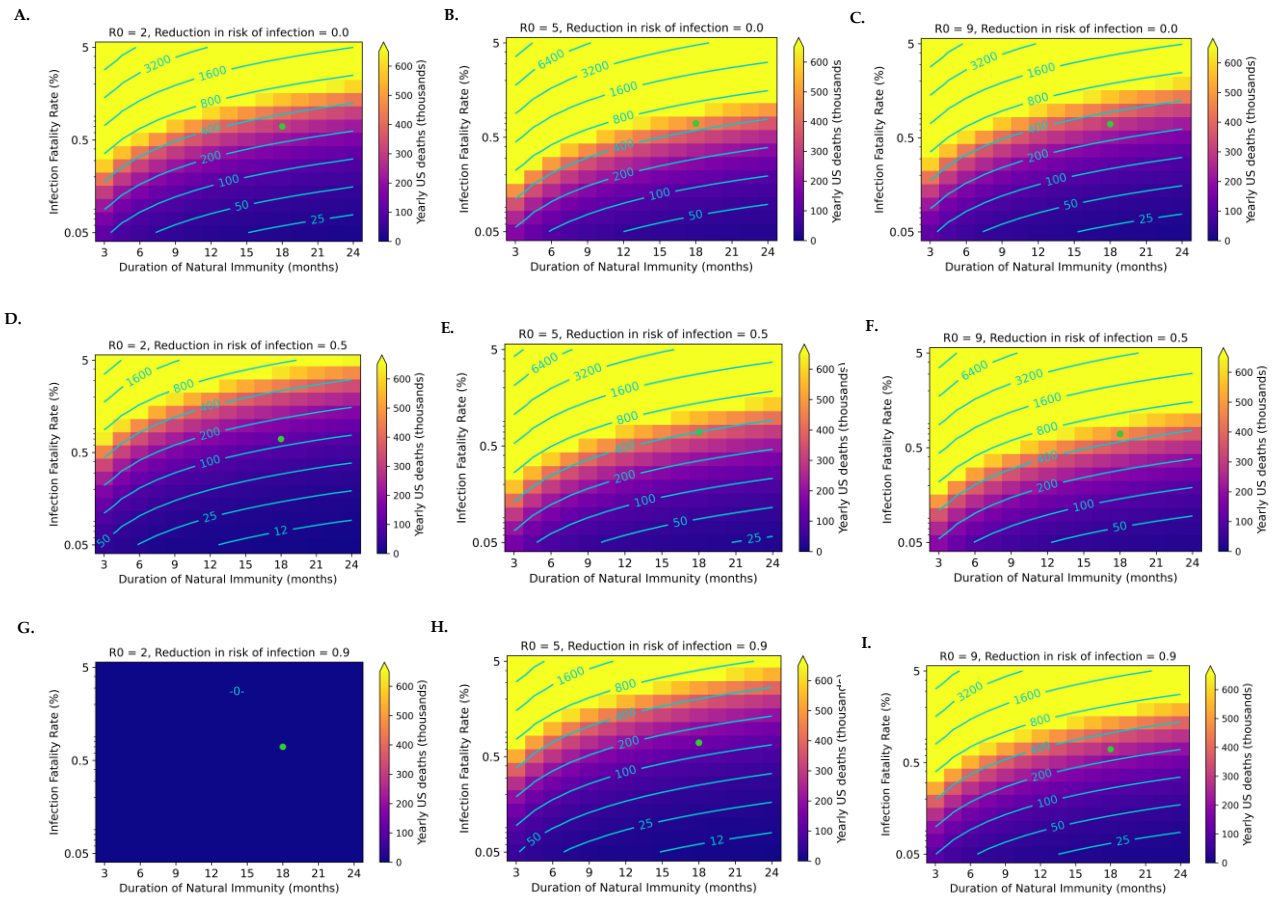

**Figure S1.** Death tolls are increased under poor vaccine performance. This figure mirrors Figure 3 but reduces VEM from 90% to 70%. The green point represents parameter values corresponding to the best-estimates of immunity and IFR for ancestral SARS-CoV-2. Yearly US COVID-19 deaths under the following transmissibility ( $R_0$ ) and vaccine efficacy against transmission conditions: **A–C)** 0% VEi and  $R_0$  of 2, 5, and 9; **D–F)** 50% VEi and  $R_0$  of 2, 5, and 9. **G–I)** 90% VEi and  $R_0$  of 2, 5, and 9. Vaccine compliance is 70% among the under-65 population, 90% among the over-65 population.

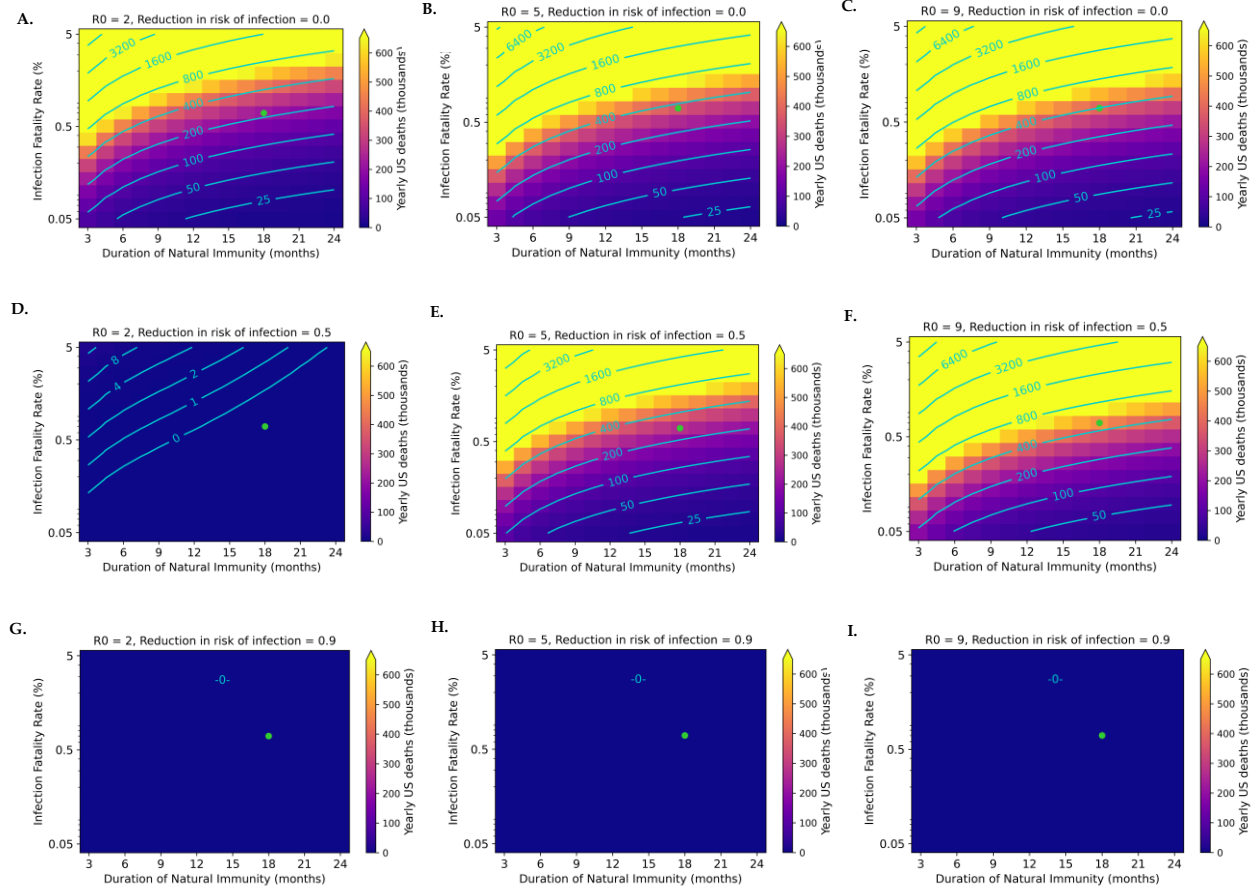

**Figure S2.** Suppression of SARS-CoV-2 transmission mitigates reduced vaccine effectiveness against mortality. This figure mirrors Figure 4 but reduces vaccine VEm from 90% to 70%. The green point represents parameter values corresponding to the best estimates of immunity and IFR for ancestral SARS-CoV-2. Yearly US COVID-19 deaths under the following transmissibility ( $R_0$ ) and vaccine efficacy against transmission conditions: **A–C)** 0% VEi and  $R_0$  of 2, 5, and 9; **D–F)** 50% VEi and  $R_0$  of 2, 5, and 9; **G–I)** 90% VEi and  $R_0$  of 2, 5, and 9. Vaccine compliance is 100%.

**Table S1.** Illustrative examples of the changes observed so far in the IFR and risk of hospitalization during the pandemic (Mar 2020- Jan 2021)

| Change                                                                          | Exemplifying scenario                                                                                                                                                                                                                                                                                                                                                                                                                                                                                                  | Ref                                    |
|---------------------------------------------------------------------------------|------------------------------------------------------------------------------------------------------------------------------------------------------------------------------------------------------------------------------------------------------------------------------------------------------------------------------------------------------------------------------------------------------------------------------------------------------------------------------------------------------------------------|----------------------------------------|
| <b>Improvements based on improved ICU protocols</b>                             | Reduction in inpatient mortality upon optimization of ICU protocols for ventilator use (3/2020) vs 11/2020): odds ratio 1.70 (95% CI 1.39–2.09).                                                                                                                                                                                                                                                                                                                                                                       | [1]                                    |
|                                                                                 | Reduction in mortality in the US, for hospitalized patients not requiring ventilation (Mar-May 2020 vs Jun-Aug 2020): 13.5% vs 4.6% (p<0.01)                                                                                                                                                                                                                                                                                                                                                                           | [2]                                    |
| <b>Change in distribution of cases among population or age-IFR relationship</b> | The observed IFR is confounded with relative risk, reflecting the behavior of vulnerable populations to reduce their relative risk of infection. We used data from the State of Massachusetts COVID tracker website to ask the question “How would the IFR change if all age groups were infected equally?” If the proportion of infected individuals in each age group reflected their proportion in the population, the intrinsic IFR so calculated is 2.46 times higher (observed IFR=0.46%, intrinsic IFR= 1.14%). | See Supplementary Table S2 for details |
| <b>Increased mortality due to lack of hospital resource availability</b>        | In April 2020, in the US, regions with an increased incidence rate of death had fewer intensive care unit beds (incident rate ratio [IRR], 0.194; 95% CI, 0.076-0.491), nurses (IRR, 0.927; 95% CI, 0.888-0.967), and general medicine/surgical beds (IRR, 0.800; 95% CI, 0.696-0.920) per COVID-19 case.                                                                                                                                                                                                              | [3]                                    |
|                                                                                 | In a study of consecutive adult patients hospitalized with severe confirmed COVID-19 pneumonia (in Mexico City from Feb- Jun 2020), 45.6% (n = 110) of the patients who died did not receive full support due to lack of ICU bed availability. Mortality rate over time correlated with the availability of ICU beds, consistent with the hypothesis that overcrowding was contributing to in-patient deaths.                                                                                                          | [4]                                    |
| <b>Intrinsic changes in virulence</b>                                           | Risk of death for the delta variant in Ontario, Canada (Feb- Jun 2021) estimated at 133% (95% CI 54%–231%) of that of the ancestral strain.                                                                                                                                                                                                                                                                                                                                                                            | [5]                                    |
|                                                                                 | Risk of death for the alpha variant in the United Kingdom (Nov 2020- Feb 2021) estimated at 161% (95% CI 142%–182%) of that of the ancestral strain.                                                                                                                                                                                                                                                                                                                                                                   | [6]                                    |
| <b>Changes in death rate with new variant (confounding hospital</b>             | Infections with the gamma (P.1) variant in Manaus, Brazil (Feb-May 2021) were 1.2 to 1.9 times more likely (50% Bayesian                                                                                                                                                                                                                                                                                                                                                                                               | [7]                                    |

|                                                                                         |                                                                                                                                                                                                                                                                                                                                                                                        |         |
|-----------------------------------------------------------------------------------------|----------------------------------------------------------------------------------------------------------------------------------------------------------------------------------------------------------------------------------------------------------------------------------------------------------------------------------------------------------------------------------------|---------|
| <b>resource availability, intrinsic changes in virulence and pre-existing immunity)</b> | Confidence Interval) to result in mortality in the period after the emergence of P.1, compared with before, although posterior estimates of this relative risk are also correlated with inferred cross-immunity.                                                                                                                                                                       |         |
| <b>Loss of vaccinal efficacy due to evolutionary immune evasion</b>                     | In the United Kingdom (Nov- Dec 2021), three doses of the Pfizer vaccine were associated with an 81% reduction (95% CI 78-85%) in risk of hospitalization with omicron. Vaccine efficacy in risk of hospitalization after 4+ weeks of vaccination was lower for omicron (HR 0.60; 95% CI: 0.20-1.42) than for delta (HR 0.27; 95%CI 0.20-0.37).                                        | [8]     |
| <b>Treatment failure due to evolutionary immune evasion</b>                             | REGEN-COV demonstrated a 72% reduction in risk of hospitalization or death during its Phase 3 trial (run in the US, Sep 2020- Jan 2021). The REGEN-COV Emergency Use Authorization (EUA) was subsequently withdrawn by the FDA (Food & Drug Administration) due to lack of efficacy against the omicron variant.                                                                       | [9,10]  |
|                                                                                         | In a Phase 3 trial (run in the US, Dec 2020- Mar 2021), Bamlanivimab treatment was associated with a significantly reduced risk-adjusted odds of hospitalization or mortality within 28 days (odds ratio [OR], 0.40; 95% confidence interval [95% CI], 0.24–0.69; P < .001). Again, the EUA was subsequently withdrawn by the FDA due to lack of efficacy against the omicron variant. | [10,11] |

**Table S2:** Estimation of the impact of shielding of older populations on apparent IFR using MA Covid tracker dataset (01/2021) as an example [12,13]. In this analysis, we used published data on age-dependent COVID-19 IFRs to calculate the Massachusetts population average intrinsic IFR based on the MA population age structure. The apparent MA IFR deviates from this intrinsic IFR because infections are not distributed equally by age group, with older groups having lower infection rates. We determined the apparent MA population IFR as an average of the age-dependent IFRs weighted by age-dependent case rates.

| <u>MA Age group</u> | <u>IFR (*)</u> | <u>%pop (1)</u> | <u>%cases (1)</u> | <u>relative risk</u> | <u>Observed IFR</u> | <u>Contrib. Obs. IFR</u> | <u>Contrib. Int. IFR</u> | <u>Cases (1)</u> |
|---------------------|----------------|-----------------|-------------------|----------------------|---------------------|--------------------------|--------------------------|------------------|
| 0 to 4              | 0.0007         | 5.15%           | 5.6%              | 109%                 | 0.0007              | 3.8E-05                  | 3.5E-05                  | 8,923            |
| 5 to 9              | 0.0012         | 5.30%           | 5.2%              | 98%                  | 0.0012              | 6.5E-05                  | 6.6E-05                  | 8,268            |
| 10 to 14            | 0.0023         | 5.72%           | 5.9%              | 103%                 | 0.0024              | 0.00013                  | 0.00013                  | 9,388            |
| 15 to 19            | 0.0042         | 6.63%           | 7.7%              | 116%                 | 0.0048              | 0.00032                  | 0.00028                  | 12,232           |
| 20 to 29            | 0.0103         | 14.74%          | 22.4%             | 152%                 | 0.0157              | 0.00232                  | 0.00152                  | 35,740           |
| 30 to 39            | 0.0345         | 13.13%          | 18.5%             | 141%                 | 0.0486              | 0.00638                  | 0.00453                  | 29,453           |
| 40 to 49            | 0.1153         | 12.08%          | 13.0%             | 108%                 | 0.1242              | 0.01500                  | 0.01393                  | 20,726           |
| 50 to 59            | 0.3853         | 13.73%          | 11.4%             | 83%                  | 0.3199              | 0.04393                  | 0.05290                  | 18,160           |
| 60 to 69            | 1.2877         | 12.08%          | 6.3%              | 52%                  | 0.6707              | 0.08102                  | 0.15555                  | 10,023           |
| 70 to 79            | 4.3033         | 7.20%           | 2.6%              | 36%                  | 1.5399              | 0.11087                  | 0.30984                  | 4,104            |
| 80 +                | 14.3814        | 4.21%           | 1.4%              | 34%                  | 4.8745              | 0.20522                  | 0.60546                  | 2,273            |

(1): data taken from MA covid tracker.

(2): regression formula from previously published meta-analysis [12] used to calculate IFR.

IFR= infection fatality rate

%pop= percentage of population

Contrib. Obs IFR= contribution of age group to observed IFR

Contrib. Int. IFR= contribution of age group to intrinsic IFR

|                                      |      |
|--------------------------------------|------|
| <b>Observed IFR</b>                  | 0.47 |
| <b>Intrinsic IFR</b>                 | 1.14 |
| <b>Hazard Ratio (intrinsic/true)</b> | 2.46 |

**Table S3:** IFRs and relative transmissibilities of SARS-CoV-2 ancestral strain and VoCs.

| <u>Variant</u>   | <u>Infection fatality</u><br><u>rate</u> | <u>Calculation</u>                        | <u>Transmissibility</u><br><u>relative to ancestral</u><br><u>strain</u> |
|------------------|------------------------------------------|-------------------------------------------|--------------------------------------------------------------------------|
| <b>Ancestral</b> | 0.68%                                    | [14]                                      | 1.00                                                                     |
| <b>Alpha</b>     | 1.09%                                    | $1.6 \times 0.68\%$ [6] **                | 1.59 [15]                                                                |
| <b>Beta</b>      | 1.71%                                    | $1.57 \times 1.6 \times 0.68\%$ [16] ***  | 1.50 [17]                                                                |
| <b>Gamma</b>     | 1.03%                                    | $1.51 \times 0.68\%$ [5] †                | 2.00 [7]                                                                 |
| <b>Delta</b>     | 1.58%                                    | $2.33 \times 0.68\%$ [5] ††               | 1.82 [18]                                                                |
| <b>Omicron</b>   | 0.21%                                    | $0.13 \times 2.33 \times 0.68\%$ [19] ††† | 2.13 (est) [20]                                                          |

\*  $R_0$  of omicron is unknown, cited study found a secondary attack rate for household transmission between unvaccinated individuals that was 1.17-fold higher than delta. (2.6-3.6 fold higher than delta, in the vaccinated population).

\*\* estimated as 60% higher than the ancestral strain in the cited publication.

\*\*\* estimated as 57% higher than the alpha variant in the cited publication.

† estimated as 51% higher than the ancestral strain in the cited publication.

†† estimated as 133% higher than the ancestral strain in the cited publication.

††† estimated as 87% lower than the delta variant in the cited publication.

## References

1. CHEST 2021: Mechanical Ventilation Associated With Higher Mortality in COVID-19 Patients. <https://www.practiceupdate.com/content/chest-2021-mechanical-ventilation-associated-with-higher-mortality-in-covid-19-patients/126115..>
2. Yeates, E.O.; Nahmias, J.; Chinn, J.; Sullivan, B.; Stopenski, S.; Amin, A.N.; Nguyen, N.T. Improved Outcomes over Time for Adult COVID-19 Patients with Acute Respiratory Distress Syndrome or Acute Respiratory Failure. *PLOS ONE* **2021**, *16*, e0253767, doi:10.1371/journal.pone.0253767.
3. Janke, A.T.; Mei, H.; Rothenberg, C.; Becher, R.D.; Lin, Z.; Venkatesh, A.K. Analysis of Hospital Resource Availability and COVID-19 Mortality Across the United States. *Journal of Hospital Medicine* **2021**, *16*, 211–214, doi:10.12788/jhm.3539.
4. Olivas-Martínez, A.; Cárdenas-Fragoso, J.L.; Jiménez, J.V.; Lozano-Cruz, O.A.; Ortiz-Brizuela, E.; Tovar-Méndez, V.H.; Medrano-Borromeo, C.; Martínez-Valenzuela, A.; Román-Montes, C.M.; Martínez-Guerra, B.; González-Lara, M.F. In-hospital mortality from severe COVID-19 in a tertiary care center in Mexico City; causes of death, risk factors and the impact of hospital saturation. *PloS one* **2021**, *16*(2), e0245772, doi: 10.1371/journal.pone.0245772.
5. Fisman, D.N.; Tu, A.R. Evaluation of the Relative Virulence of Novel SARS-CoV-2 Variants: A Retrospective Cohort Study in Ontario, Canada. *CMAJ* **2021**, *193*, E1619–E1625, doi:10.1503/cmaj.211248.
6. Davies, N.G.; Jarvis, C.I.; Edmunds, W.J.; Jewell, N.P.; Diaz-Ordaz, K.; Keogh, R.H. Increased Mortality in Community-Tested Cases of SARS-CoV-2 Lineage B.1.1.7. *Nature* **2021**, *593*, 270–274, doi:10.1038/s41586-021-03426-1.
7. Faria, N.R.; Mellan, T.A.; Whittaker, C.; Claro, I.M.; Candido, D. da S.; Mishra, S.; Crispim, M.A.E.; Sales, F.C.S.; Hawryluk, I.; McCrone, J.T.; et al. Genomics and Epidemiology of the P.1 SARS-CoV-2 Lineage in Manaus, Brazil. *Science* **2021**, *372*, 815–821, doi:10.1126/science.abh2644.
8. UK Health Security Agency, SARS-CoV-2 Variants of Concern and Variants under Investigation. 2021.
9. Weinreich, D.M.; Sivapalasingam, S.; Norton, T.; Ali, S.; Gao, H.; Bhore, R.; Xiao, J.; Hooper, A.T.; Hamilton, J.D.; Musser, B.J.; Rofail, D. REGEN-COV antibody combination and outcomes in outpatients with Covid-19. *New England Journal of Medicine* **2021**, *385*(23), e81, doi: 10.1056/NEJMoa2108163.
10. FDA Halts Use of Regeneron and Eli Lilly Antibody Drugs That Don't Work against Covid Omicron. *CNBC* 2022.
11. Bariola, J.R.; McCreary, E.K.; Wadas, R.J.; Kip, K.E.; Marroquin, O.C.; Minnier, T.; Koscomb, S.; Collins, K.; Schmidhofer, M.; Shovel, J.A.; et al. Impact of Bamlanivimab Monoclonal Antibody Treatment on

- Hospitalization and Mortality Among Nonhospitalized Adults With Severe Acute Respiratory Syndrome Coronavirus 2 Infection. *Open Forum Infectious Diseases* **2021**, 8, ofab254, doi:10.1093/ofid/ofab254.
12. Levin, A.T.; Hanage, W.P.; Owusu-Boaitey, N.; Cochran, K.B.; Walsh, S.P.; Meyerowitz-Katz, G. Assessing the Age Specificity of Infection Fatality Rates for COVID-19: Systematic Review, Meta-Analysis, and Public Policy Implications. *Eur J Epidemiol* **2020**, 35, 1123–1138, doi:10.1007/s10654-020-00698-1.
  13. COVID-19 Response Reporting - Mass.Gov. <https://www.mass.gov/info-details/covid-19-response-reporting>.
  14. Meyerowitz-Katz, G.; Merone, L. A Systematic Review and Meta-Analysis of Published Research Data on COVID-19 Infection Fatality Rates. *Int J Infect Dis* **2020**, 101, 138–148, doi:10.1016/j.ijid.2020.09.1464.
  15. Davies, N.G.; Abbott, S.; Barnard, R.C.; Jarvis, C.I.; Kucharski, A.J.; Munday, J.D.; Pearson, C.A.; Russell, T.W.; Tully, D.C.; Washburne, A.D.; Wenseleers, T. Estimated transmissibility and impact of SARS-CoV-2 lineage B.1.1.7 in England. *Science* **2021**, 372(6538), eabg3055, doi: 10.1126/science.abg3055.
  16. Abu-Raddad, L.J.; Chemaitelly, H.; Ayoub, H.H.; Yassine, H.M.; Benslimane, F.M.; Al Khatib, H.A.; Tang, P.; Hasan, M.R.; Coyle, P.; AlMukdad, S.; et al. Severity, Criticality, and Fatality of the Severe Acute Respiratory Syndrome Coronavirus 2 (SARS-CoV-2) Beta Variant. *Clinical Infectious Diseases* **2021**, ciab909, doi:10.1093/cid/ciab909.
  17. Pearson, C.A.B.; Russell, T.J.; Davies, N.; Kucharski, A.J., CMMID COVID-19 working group; Edmunds, W.J.; Eggo, R.M. Estimates of severity and transmissibility of novel SARS-CoV-2 variant 501Y.V2 in South Africa. *CMMID Repository* **2021**.
  18. Liu, Y.; Rocklöv, J. The Reproductive Number of the Delta Variant of SARS-CoV-2 Is Far Higher Compared to the Ancestral SARS-CoV-2 Virus. *Journal of Travel Medicine* **2021**, 28, taab124, doi:10.1093/jtm/taab124.
  19. Liu, Y.; Yu, Y.; Zhao, Y.; He, D. Reduction in the Infection Fatality Rate of Omicron (B.1.1.529) Variant Compared to Previous Variants in South Africa. *Social Science Research Network* **2022**, doi: 10.2139/ssrn.4010080.
  20. Lyngse, F.P.; Mortensen, L.H.; Denwood, M.J.; Christiansen, L.E.; Møller, C.H.; Skov, R.L.; Spiess, K.; Fomsgaard, A.; Lassaunière, M.M.; Rasmussen, M.; et al. SARS-CoV-2 Omicron VOC Transmission in Danish Households. *medRxiv* **2021**, doi: 10.1101/2021.12.27.21268278.
